# Supplementary material for: A series of polyoxometalate-based hybrid complexes constructed by a tripodal ligand containing mixed N/O donors
Source: Royal Society of Chemistry journal article supplement (doi:10.1039/d1ce01195b), 2021-01-01
Supplement: d1ce01195b1.pdf [file d1ce01195b1.pdf]

Supplementary Material (ESI) for *CrystEngComm*  
This journal is © The Royal Society of Chemistry

## A series of polyoxometalate-based hybrid complexes constructed by a tripodal ligand containing mixed N/O donors

Jun Ying, Liang Jin, Hai-Yan Yu, Ai-Xiang Tian\*, Xiu-Li Wang\*

Table S1. Selected bond distances (Å) and angles (°) for complexes 1–6.

| Complex 1                                                                                  |            |                                |            |
|--------------------------------------------------------------------------------------------|------------|--------------------------------|------------|
| Cd(1)–N(4)                                                                                 | 2.139(5)   | Cd(1)–N(5)                     | 2.133(5)   |
| N(5)–Cd(1)–N(4)                                                                            | 178.9(2)   |                                |            |
| Symmetry codes: <sup>1</sup> 1–X,1–Y,1–Z; <sup>2</sup> –X,1–Y,1–Z; <sup>3</sup> 1–X,–Y,1–Z |            |                                |            |
| Complex 2                                                                                  |            |                                |            |
| Co(1)–N(1) <sup>3</sup>                                                                    | 2.124(4)   | Co(1)–O(3)                     | 2.047(4)   |
| Co(1)–O(6) <sup>2</sup>                                                                    | 2.100(4)   | Co(1)–O(4)                     | 2.075(4)   |
| Co(1)–O(5)                                                                                 | 2.056(4)   | Co(1)–O(1)                     | 2.143(4)   |
| O(3)–Co(1)–O(4)                                                                            | 93.08(17)  | O(5)–Co(1)–O(4)                | 89.61(16)  |
| O(3)–Co(1)–O(1)                                                                            | 87.13(16)  | O(5)–Co(1)–O(1)                | 84.68(15)  |
| O(3)–Co(1)–N(1) <sup>3</sup>                                                               | 102.59(17) | O(5)–Co(1)–N(1) <sup>3</sup>   | 85.58(16)  |
| O(4)–Co(1)–O(6) <sup>2</sup>                                                               | 178.23(17) | O(3)–Co(1)–O(6) <sup>2</sup>   | 87.64(16)  |
| O(4)–Co(1)–O(1)                                                                            | 92.17(18)  | O(3)–Co(1)–O(5)                | 171.47(16) |
| O(4)–Co(1)–N(1) <sup>3</sup>                                                               | 88.13(18)  | C(3)–N(1)–Co(1) <sup>4</sup>   | 114.2(4)   |
| N(1) <sup>3</sup> –Co(1)–O(1)                                                              | 170.25(17) | O(5)–Co(1)–O(6) <sup>2</sup>   | 89.91(15)  |
| Mo(4)–O(5)–Co(1)                                                                           | 145.9(2)   | C(1)–N(1)–Co(1) <sup>4</sup>   | 132.6(4)   |
| O(6) <sup>2</sup> –Co(1)–N(1) <sup>3</sup>                                                 | 90.14(17)  | O(6) <sup>2</sup> –Co(1)–O(1)  | 89.48(16)  |
| Symmetry codes: <sup>1</sup> 1–X,1–Y,2–Z; <sup>2</sup> –X,1–Y,1–Z; <sup>3</sup> +X,1+Y,+Z  |            |                                |            |
| Complex 3                                                                                  |            |                                |            |
| Cu(05)–O(17)                                                                               | 2.072(5)   | Cu(05)–O(2) <sup>2</sup>       | 2.178(4)   |
| Cu(05)–N(2)                                                                                | 2.097(6)   | Cu(05)–O(3)                    | 2.043(4)   |
| Cu(05)–O(4)                                                                                | 2.110(4)   | Cu(05)–O(5) <sup>3</sup>       | 2.140(4)   |
| Mo(1)–O(5)–Cu(05) <sup>3</sup>                                                             | 171.7(3)   | O(3)–Cu(05)–O(4)               | 168.70(18) |
| O(4)–Cu(05)–O(2) <sup>2</sup>                                                              | 82.26(17)  | O(3)–Cu(05)–O(5) <sup>3</sup>  | 87.42(18)  |
| O(5) <sup>3</sup> –Cu(05)–O(2) <sup>2</sup>                                                | 87.22(18)  | O(3)–Cu(05)–O(2) <sup>2</sup>  | 86.99(18)  |
| Mo(1)–O(4)–Cu(05)                                                                          | 146.4(3)   | O(3)–Cu(05)–O(17)              | 95.04(19)  |
| N(2)–Cu(05)–O(2) <sup>2</sup>                                                              | 167.95(19) | O(3)–Cu(05)–N(2)               | 104.8(2)   |
| C(5)–N(2)–Cu(05)                                                                           | 115.2(5)   | O(17)–Cu(05)–O(4)              | 88.77(19)  |
| C(1)–O(2)–Cu(05) <sup>4</sup>                                                              | 134.9(4)   | O(17)–Cu(05)–O(5) <sup>3</sup> | 177.25(19) |
| C(6)–N(2)–Cu(05)                                                                           | 133.5(5)   | O(17)–Cu(05)–O(2) <sup>2</sup> | 91.7(2)    |

**Supplementary Material (ESI) for *CrystEngComm***  
**This journal is © The Royal Society of Chemistry**

|                               |           |                   |           |
|-------------------------------|-----------|-------------------|-----------|
| O(4)–Cu(05)–O(5) <sup>3</sup> | 88.59(18) | O(17)–Cu(05)–N(2) | 89.9(2)   |
| N(2)–Cu(05)–O(5) <sup>3</sup> | 90.6(2)   | N(2)–Cu(05)–O(4)  | 85.84(19) |

Symmetry codes: <sup>1</sup>1-X,-Y,2-Z; <sup>2</sup>+X,-1+Y,+Z; <sup>3</sup>2-X,-Y,1-Z

**Complex 4**

|                               |          |                                            |          |
|-------------------------------|----------|--------------------------------------------|----------|
| Fe(1)–O(3)                    | 2.060(7) | N(4)–Fe(1) <sup>4</sup>                    | 2.127(9) |
| Fe(1)–O(2)                    | 2.148(8) | O(4)–Fe(1) <sup>2</sup>                    | 2.097(7) |
| Fe(1)–O(5)                    | 2.064(7) | Fe(1)–O(4) <sup>2</sup>                    | 2.097(7) |
| Fe(1)–O(6)                    | 2.084(8) | Mo(1)–O(4)–Fe(1) <sup>2</sup>              | 174.9(4) |
| O(3)–Fe(1)–O(2)               | 84.6(3)  | O(3)–Fe(1)–O(4) <sup>2</sup>               | 90.6(3)  |
| O(3)–Fe(1)–O(5)               | 171.2(3) | O(3)–Fe(1)–N(4) <sup>3</sup>               | 85.5(3)  |
| O(3)–Fe(1)–O(6)               | 89.1(3)  | O(5)–Fe(1)–O(2)                            | 86.9(3)  |
| O(5)–Fe(1)–O(6)               | 93.1(3)  | O(4) <sup>2</sup> –Fe(1)–N(4) <sup>3</sup> | 90.4(3)  |
| O(5)–Fe(1)–O(4) <sup>2</sup>  | 87.3(3)  | N(4) <sup>3</sup> –Fe(1)–O(2)              | 170.1(3) |
| C(13)–N(4)–Fe(1) <sup>4</sup> | 115.4(7) | O(5)–Fe(1)–N(4) <sup>3</sup>               | 103.0(3) |
| C(13)–N(4)–C(12)              | 103.9(9) | O(6)–Fe(1)–O(2)                            | 91.4(3)  |
| C(12)–N(4)–Fe(1) <sup>4</sup> | 134.0(8) | O(6)–Fe(1)–O(4) <sup>2</sup>               | 178.7(3) |
| Mo(1)–O(3)–Fe(1)              | 145.4(4) | O(6)–Fe(1)–N(4) <sup>3</sup>               | 88.3(4)  |
| C(1)–O(2)–Fe(1)               | 132.8(7) | O(4) <sup>2</sup> –Fe(1)–O(2)              | 89.9(3)  |

Symmetry codes: <sup>1</sup>1-X,1-Y,1-Z; <sup>2</sup>-X,1-Y,1-Z; <sup>3</sup>1-X,-Y,1-Z

**Complex 5**

|                                              |            |                                |            |
|----------------------------------------------|------------|--------------------------------|------------|
| Ni(1)–O(13)                                  | 2.0256(18) | Ni(1)–O(12) <sup>3</sup>       | 2.0716(19) |
| Ni(1)–O(16) <sup>2</sup>                     | 2.1015(19) | Ni(1)–O(14)                    | 2.047(2)   |
| Ni(1)–N(4)                                   | 2.085(2)   | Ni(1)–O(15)                    | 2.0311(19) |
| O(13)–Ni(1)–O(15)                            | 172.72(8)  | O(14)–Ni(1)–N(4)               | 88.00(10)  |
| O(13)–Ni(1)–N(4)                             | 85.89(8)   | O(15)–Ni(1)–O(16) <sup>2</sup> | 86.71(8)   |
| O(12) <sup>3</sup> –Ni(1)–O(16) <sup>2</sup> | 89.67(8)   | O(15)–Ni(1)–O(12) <sup>3</sup> | 87.25(8)   |
| O(12) <sup>3</sup> –Ni(1)–N(4)               | 90.53(9)   | O(15)–Ni(1)–O(14)              | 93.17(9)   |
| O(14)–Ni(1)–O(16) <sup>2</sup>               | 91.77(9)   | O(15)–Ni(1)–N(4)               | 101.01(9)  |
| O(14)–Ni(1)–O(12) <sup>3</sup>               | 178.52(9)  | N(4)–Ni(1)–O(16) <sup>2</sup>  | 172.27(8)  |
| C(7)–O(16)–Ni(1) <sup>4</sup>                | 131.73(17) | Mo(4)–O(13)–Ni(1)              | 144.90(11) |
| Mo(4)–O(12)–Ni(1) <sup>3</sup>               | 173.51(12) | O(13)–Ni(1)–O(16) <sup>2</sup> | 86.38(7)   |
| C(13)–N(4)–Ni(1)                             | 133.1(2)   | O(13)–Ni(1)–O(12) <sup>3</sup> | 90.40(8)   |
| C(11)–N(4)–Ni(1)                             | 114.61(19) | O(13)–Ni(1)–O(14)              | 89.36(8)   |

Symmetry codes: <sup>1</sup>1-X,2-Y,-Z; <sup>2</sup>+X,1+Y,+Z; <sup>3</sup>-X,2-Y,1-Z

**Complex 6**

|                                              |           |                                |           |
|----------------------------------------------|-----------|--------------------------------|-----------|
| Zn(1)–O(13)                                  | 2.093(2)  | Zn(1)–O(16) <sup>2</sup>       | 2.166(2)  |
| Zn(1)–O(12) <sup>3</sup>                     | 2.156(2)  | Zn(1)–O(15)                    | 2.043(2)  |
| Zn(1)–N(1)                                   | 2.098(3)  | Zn(1)–O(14)                    | 2.081(3)  |
| O(12) <sup>3</sup> –Zn(1)–O(16) <sup>2</sup> | 87.17(10) | O(14)–Zn(1)–O(16) <sup>2</sup> | 92.44(11) |

**Supplementary Material (ESI) for *CrystEngComm***  
**This journal is © The Royal Society of Chemistry**

|                                |            |                                 |            |
|--------------------------------|------------|---------------------------------|------------|
| O(15)–Zn(1)–O(13)              | 169.21(10) | O(14)–Zn(1)–N(1)                | 89.55(12)  |
| O(15)–Zn(1)–O(12) <sup>3</sup> | 87.35(10)  | N(1)–Zn(1)–O(12) <sup>3</sup>   | 90.44(11)  |
| O(15)–Zn(1)–O(16) <sup>2</sup> | 86.77(10)  | N(1)–Zn(1)–O(16) <sup>2</sup>   | 168.54(10) |
| O(15)–Zn(1)–O(14)              | 94.69(11)  | Mo(01)–O(13)–Zn(1)              | 146.38(14) |
| O(15)–Zn(1)–N(1)               | 104.32(11) | Mo(01)–O(12)–Zn(1) <sup>3</sup> | 172.34(15) |
| O(14)–Zn(1)–O(13)              | 89.20(10)  | C(8)–O(16)–Zn(1) <sup>4</sup>   | 133.9(2)   |
| O(14)–Zn(1)–O(12) <sup>3</sup> | 177.90(10) | O(13)–Zn(1)–O(12) <sup>3</sup>  | 88.71(9)   |
| O(13)–Zn(1)–O(16) <sup>2</sup> | 83.00(9)   | C(1)–N(1)–Zn(1)                 | 115.0(2)   |
| O(13)–Zn(1)–N(1)               | 85.74(10)  | C(2)–N(1)–Zn(1)                 | 132.6(2)   |

Symmetry codes: <sup>1</sup>1-X,2-Y,-Z; <sup>2</sup>+X,1+Y,+Z; <sup>3</sup>-X,2-Y,1-Z

---

Table S2. The coordination modes of TMs, ligands and polyanions in complexes 1–6.

| Complex    | 1                                                                                  | 2-6                                                                                  |
|------------|------------------------------------------------------------------------------------|--------------------------------------------------------------------------------------|
| TMs        | 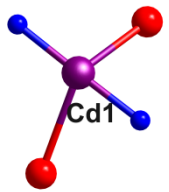  |   |
| Ligand     |   |   |
| Polyanions |  |  |

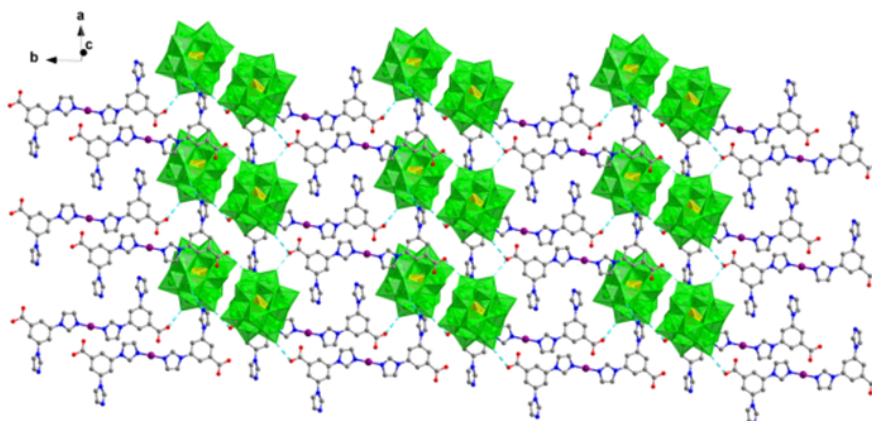

Fig. S1. View of the 2D supramolecular structure of complex 1.

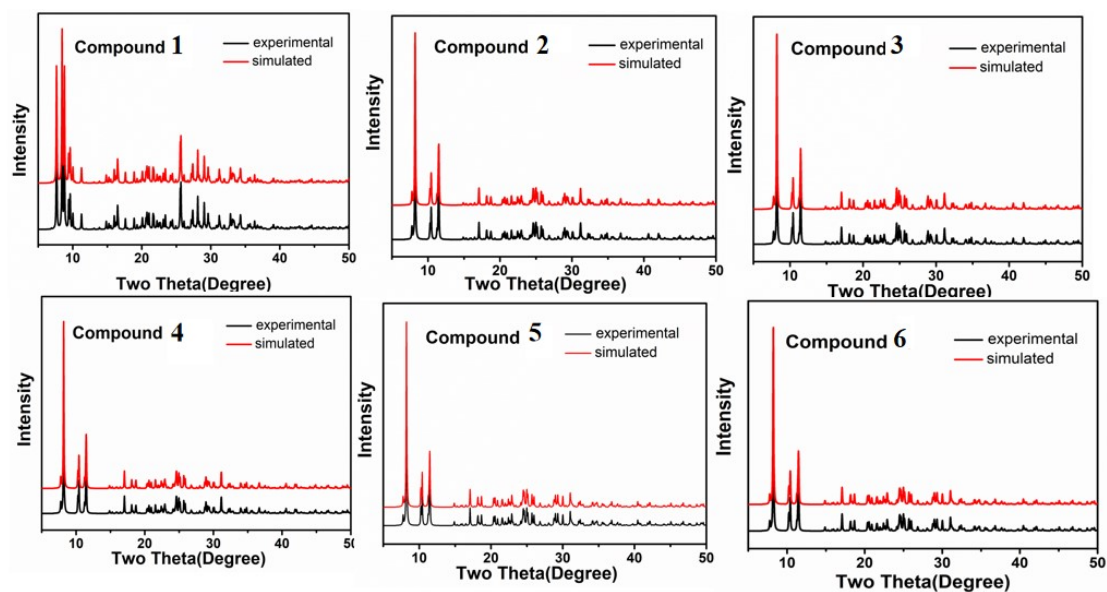

Fig. S2. The PXRD patterns of complexes 1–6.

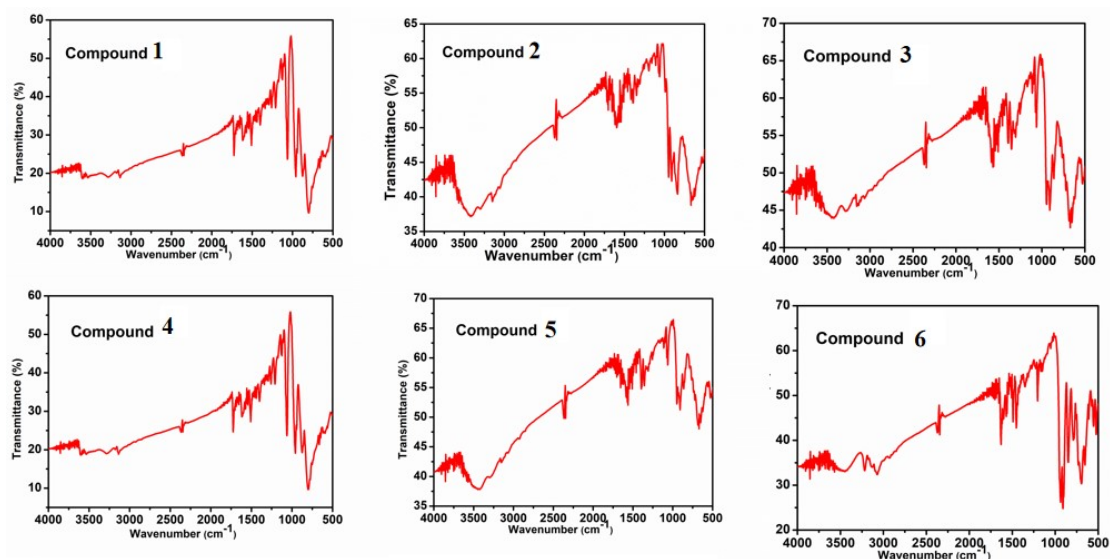

Fig. S3. The IR spectra of complexes 1–6.

Table S3. The IR Spectra data of complexes 1–6.

|   | $\nu(\text{Mo}-\text{O}_a)$ | $\nu(\text{Mo}-\text{O}_d)$ | $\nu(\text{Mo}-\text{O}_{b/c}-\text{Mo})$ | $\nu(\text{Mo}-\text{O}_b)$ | $\nu(\text{Mo}-\text{O}_t)$ | $\nu(\text{P}-\text{O})$ | Ligand    |
|---|-----------------------------|-----------------------------|-------------------------------------------|-----------------------------|-----------------------------|--------------------------|-----------|
| 1 | –                           | 959                         | 876, 799                                  | –                           | –                           | 1057                     | 1192–1736 |
| 2 | 823                         | –                           | –                                         | 934                         | 669                         | –                        | 1192–1736 |
| 3 | 893                         | –                           | –                                         | 941                         | 663                         | –                        | 1192–1736 |
| 4 | 802                         | –                           | –                                         | 949                         | 669                         | –                        | 1192–1736 |
| 5 | 900                         | –                           | –                                         | 956                         | 641                         | –                        | 1192–1736 |

|   |     |   |   |     |     |   |           |
|---|-----|---|---|-----|-----|---|-----------|
| 6 | 906 | – | – | 934 | 691 | – | 1192–1736 |
|---|-----|---|---|-----|-----|---|-----------|

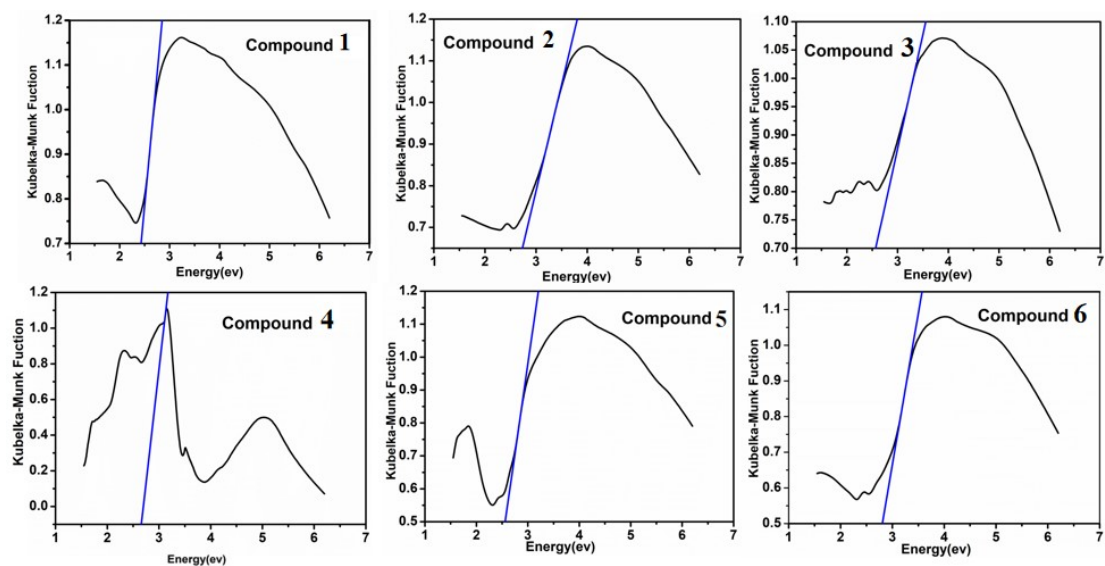

**Fig. S4.** The Diffuse reflection spectra of complexes 1–6.

**Table S4.** Experimental data for detecting Cr(VI), Fe(III), and H<sub>2</sub>O<sub>2</sub> using 1–, 2– CPEs as amperometric sensors.

| CPE | substance                     | Response time | Concentration range                          | Sensitivity                    | Correlation coefficient | Detection limit        |
|-----|-------------------------------|---------------|----------------------------------------------|--------------------------------|-------------------------|------------------------|
| 1   | Cr(VI)                        | 2.1s          | $4 \times 10^{-3}$ – $9.2 \times 10^{-2}$ mM | 2.53366 $\mu\text{A mM}^{-1}$  | 0.99687                 | $5.3 \times 10^{-4}$ M |
| 2   | Cr(VI)                        | 1.8s          | $4 \times 10^{-3}$ – $9.2 \times 10^{-2}$ mM | 45.1197 $\mu\text{A mM}^{-1}$  | 0.99957                 | $2.3 \times 10^{-3}$ M |
| 1   | Fe(III)                       | 2.2s          | $4 \times 10^{-3}$ – $9.2 \times 10^{-2}$ mM | 8.10058 $\mu\text{A mM}^{-1}$  | 0.99633                 | $2.3 \times 10^{-4}$ M |
| 2   | Fe(III)                       | 2.3s          | $4 \times 10^{-3}$ – $9.2 \times 10^{-2}$ mM | 74.1925 $\mu\text{A mM}^{-1}$  | 0.99980                 | $1.2 \times 10^{-3}$ M |
| 1   | H <sub>2</sub> O <sub>2</sub> | 2.7s          | $4 \times 10^{-3}$ – $9.2 \times 10^{-2}$ mM | 8.06275 $\mu\text{A mM}^{-1}$  | 0.99868                 | $1.0 \times 10^{-3}$ M |
| 2   | H <sub>2</sub> O <sub>2</sub> | 2.5s          | $4 \times 10^{-3}$ – $9.2 \times 10^{-2}$ mM | 54.20066 $\mu\text{A mM}^{-1}$ | 0.99986                 | $9.0 \times 10^{-4}$ M |

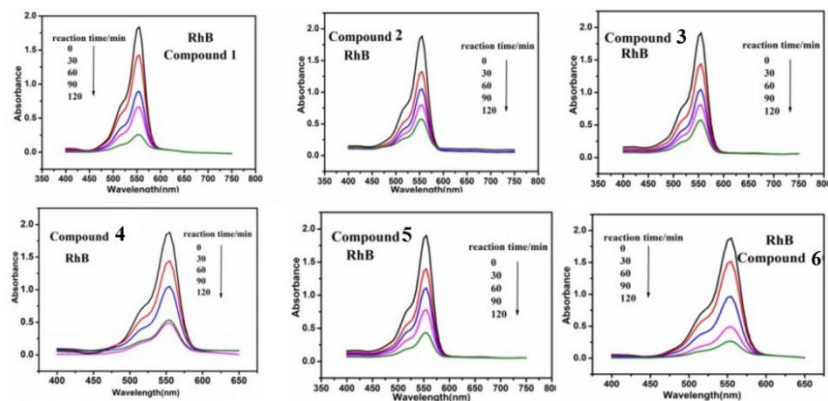

**Fig. S5.** The UV-vis absorption spectra of aqueous RhB under UV light irradiation in the present of complexes 1–6.

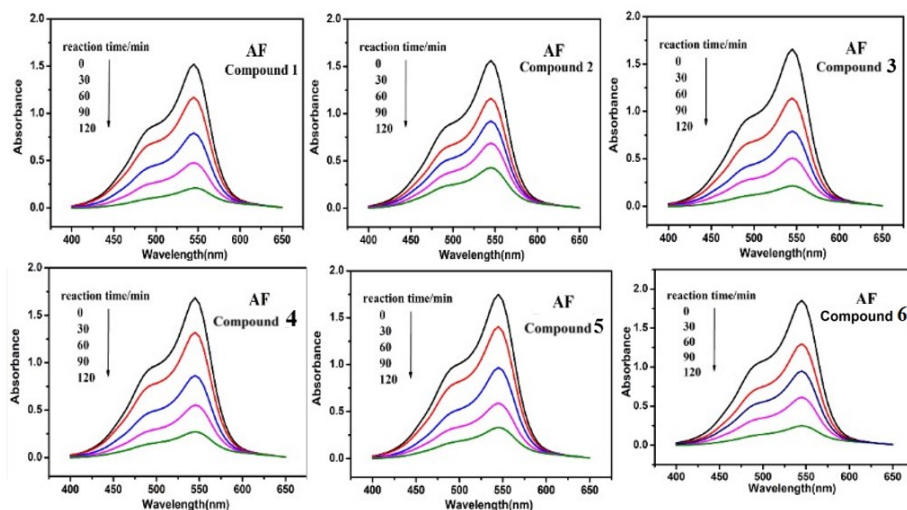

**Fig. S6.** The UV-vis absorption spectra of aqueous AF under UV light irradiation in the present of complexes 1–6.

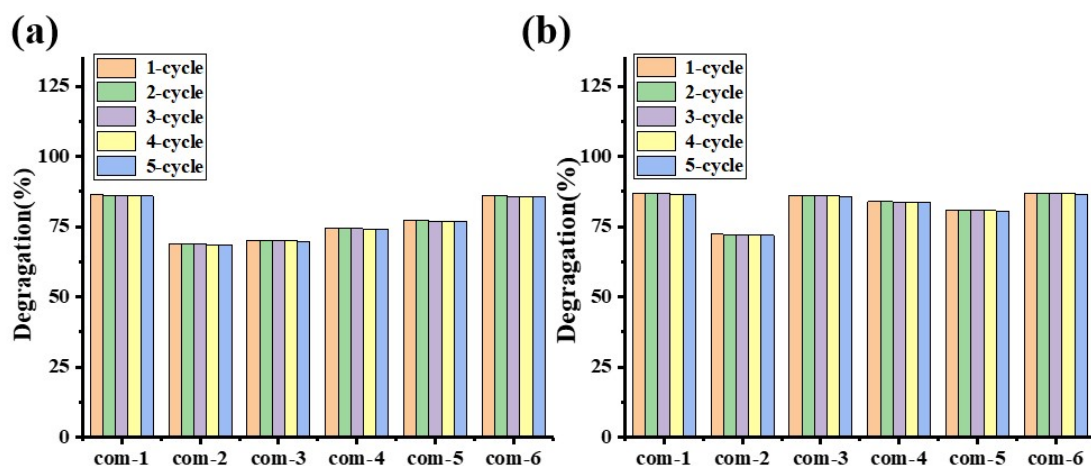

**Fig. S7.** Degradation rates of complexes 1–6 as catalysts in cyclic test.



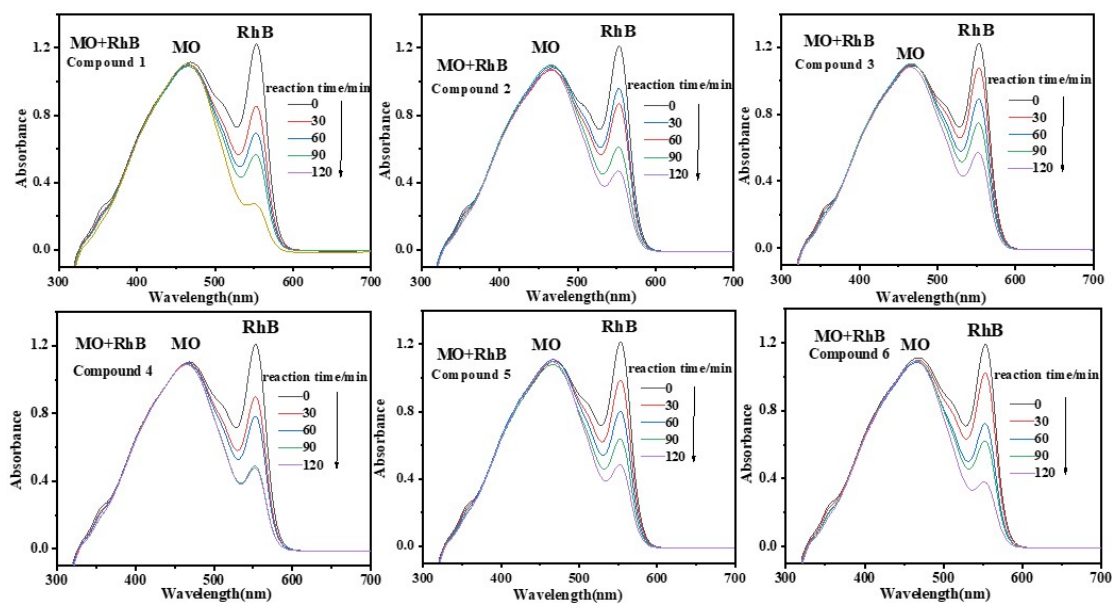

**Fig. S8.** The UV-vis absorption spectra of aqueous MO+RhB under UV light irradiation in the presence of complexes 1–6.

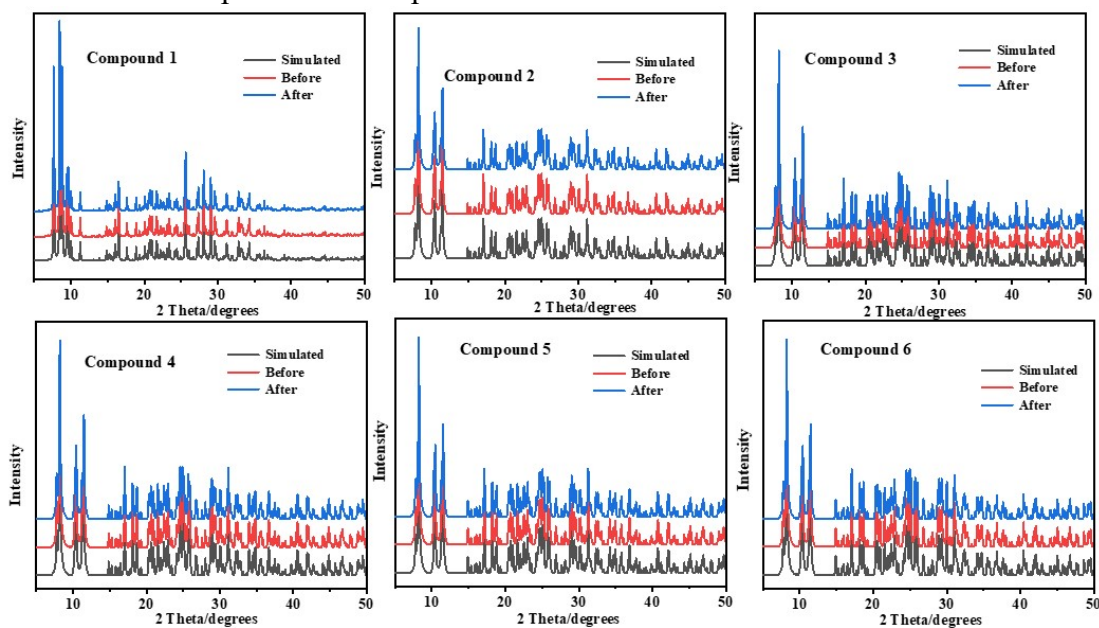

**Fig. S9.** The PXRD patterns of complexes 1–6 ( Before and after photocatalysis of RhB).
